# Supplementary material for: Comparison of mean age of air in five reanalyses using the BASCOE transport model
Source: Copernicus journal article supplement (doi:10.5194/acp-18-14715-2018), 2018-10-12
Supplement: Supplementary file [file acp-18-14715-2018-supplement-title-page.pdf › acp-18-14715-2018-supplement-title-page.pdf]

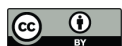

## *Supplement of*

# **Comparison of mean age of air in five reanalyses using the BASCOE transport model**

**Simon Chabrillat et al.**

*Correspondence to:* Simon Chabrillat ([simon.chabrillat@aeronomie.be](mailto:simon.chabrillat@aeronomie.be))

- [acp-18-14715-2018-supplement-title-page.pdf](#)
- [aoa100\\_CFSR.mzm.nc](#)
- [aoa100\\_ERA-I.mzm.nc](#)
- [aoa100\\_JRA-55.mzm.nc](#)
- [aoa100\\_MERRA-2.mzm.nc](#)
- [aoa100\\_MERRA.mzm.nc](#)

The copyright of individual parts of the supplement might differ from the CC BY 4.0 License.
